# Supplementary material for: Genome-resolved metagenomics and culturomics reveal a fiber- degrading gut microbiome in Dahuabai pigs with culture-validated cellulase activity
Source: Research Square preprint supplement (doi:10.21203/rs.3.rs-7579863/v1), 2025-11-12
Supplement: Supplementary file 1 [file f242785699b4e053967a1bb2.xlsx]

## Sheet: S1
Culture Media and Cultivation Conditions
Medium	Ingredients/Improved conditions	Application condition
Base GAM+5% defibrillated sheep blood	-	Aerobic, anaerobic (37℃)
Modified Brain and Heart Extract Solid Medium (BHI-1)	BHI+0.5g/L L-cysteine, 10mg/L hematin, 1mg/L Vitamin K	Aerobic, anaerobic (37℃)
Columbia Blood AGAR Base (CBA)	-	Aerobic, anaerobic (37℃)
mac conkey broth	-	Aerobic, anaerobic (37℃)
M17 AGAR	-	Aerobic (37℃)
MRS Broth	+2% AGAR powder	Aerobic (37℃)
MRS Broth	Base GAM+5% defibrillated sheep blood	Aerobic (37℃)
Modified GAM Medium	Base GAM+5% defibrillated sheep blood	Anaerobic (37℃)
Caustic anaerobic AGAR (FAA)	-	Anaerobic (37℃)
W-C anaerobic broth	+2% AGAR powder	Anaerobic (37℃)
Modified MRS Medium	-	Anaerobic (37℃)
PYG liquid medium base	+2% AGAR powder	Anaerobic (37℃)
PYG Liquid Medium Base (PYG-1)	PYG+5mg/L hematin chloride, 1mg/L Vitamin K	Anaerobic (37℃)
Cellulose Congo red culture-medium	-	Aerobic, anaerobic (37℃)
CMC-Na	-	Aerobic, anaerobic (37℃)

## Sheet: S2
A species-resolved catalog of CAZyme functions within the DHB gut microbiota
Taxonomy	kingdom	Phylum	Class	Order	Family	Genus	Species	GH1	GH3	GH5	GH6	GH7	GH9	GH48	AA9	AA10
DHB-12_bin.56	d__Bacteria	p__Bacillota	c__Clostridia	o__Oscillospirales	f__Ruminococcaceae	g__Ruminococcus_C	s__Ruminococcus_C sp000433635	4	4	12	1	0	5	1	0	0
DHB-12_bin.65	d__Bacteria	p__Spirochaetota	c__Spirochaetia	o__Treponematales	f__Treponemataceae	g__Treponema_D	s__Treponema_D berlinense	5	10	11	1	0	0	0	0	0
DHB-12_bin.7	d__Bacteria	p__Bacillota	c__Bacilli	o__RF39	f__UBA660	g__UMGS1271	s__UMGS1271 sp900550255	1	1	2	1	0	0	0	1	0
DHB-14_bin.29	d__Bacteria	p__Bacillota	c__Clostridia	o__Oscillospirales	f__Oscillospiraceae	g__Vescimonas	s__Vescimonas sp902388735	3	7	3	0	0	0	1	1	0
DHB-14_bin.78	d__Bacteria	p__Bacillota	c__Clostridia	o__Oscillospirales	f__Ruminococcaceae	g__CAG-115	s__CAG-115 sp022766785	7	9	19	1	0	2	0	0	0
DHB-14_bin.85	d__Bacteria	p__Bacillota	c__Clostridia	o__Peptostreptococcales	f__Anaerovoracaceae	g__Mogibacterium_A	s__Mogibacterium_A kristiansenii	2	4	6	1	0	1	0	1	0
DHB-15_bin.22	d__Bacteria	p__Bacillota	c__Bacilli	o__RF39	f__UBA660	g__Aphodocola	s__Aphodocola sp945969495	3	1	3	1	0	0	0	1	0
DHB-15_bin.24	d__Bacteria	p__Bacillota	c__Clostridia	o__Lachnospirales	f__Lachnospiraceae	g__Oliverpabstia	s__Oliverpabstia sp004556655	8	23	6	1	1	0	0	0	0
DHB-16_bin.28	d__Bacteria	p__Bacillota	c__Clostridia	o__Clostridiales	f__Clostridiaceae	g__Clostridium	s__Clostridium sp000435835	8	5	4	1	0	0	0	0	0
DHB-16_bin.69	d__Bacteria	p__Bacillota	c__Bacilli	o__RF39	f__UBA660	g__CAJGDV01	s__CAJGDV01 sp022763805	2	3	3	1	0	0	0	0	0
DHB-17_bin.10	d__Bacteria	p__Bacteroidota	c__Bacteroidia	o__Bacteroidales	f__Muribaculaceae	g__SFTJ01	s__SFTJ01 sp004563195	7	13	12	1	0	2	0	0	0
DHB-17_bin.29	d__Bacteria	p__Bacillota	c__Clostridia	o__Lachnospirales	f__Lachnospiraceae	g__CAG-194	s__CAG-194 sp000432915	9	12	11	1	0	3	0	0	0
DHB-19_bin.31	d__Bacteria	p__Bacillota	c__Bacilli	o__Lactobacillales	f__Lactobacillaceae	g__Lactobacillus	s__Lactobacillus sp910589675	25	4	3	0	2	0	0	0	0
DHB-19_bin.39	d__Bacteria	p__Bacillota	c__Clostridia	o__Lachnospirales	f__Lachnospiraceae	g__UBA11957	s__UBA11957 sp945827805	7	10	6	1	0	1	0	1	0
DHB-19_bin.75	d__Bacteria	p__Bacillota	c__Clostridia	o__Peptostreptococcales	f__Anaerovoracaceae	g__Mogibacterium_A	s__Mogibacterium_A kristiansenii	3	6	6	1	0	1	0	0	0
DHB-19_bin.76	d__Bacteria	p__Bacillota	c__Negativicutes	o__Veillonellales	f__Megasphaeraceae	g__Megasphaera	s__Megasphaera elsdenii	6	6	8	1	0	0	0	1	0
DHB-20_bin.9	d__Bacteria	p__Bacillota	c__Clostridia	o__Lachnospirales	f__Lachnospiraceae	g__Oliverpabstia	s__Oliverpabstia sp004556655	11	24	7	1	1	1	0	0	0
DHB-21_bin.21	d__Bacteria	p__Bacillota	c__Bacilli	o__Erysipelotrichales	f__Erysipelotrichaceae	g__Faecalitalea	s__Faecalitalea sp946408025	15	4	5	1	0	0	0	0	0
DHB-21_bin.35	d__Bacteria	p__Bacillota	c__Clostridia	o__Oscillospirales	f__Ruminococcaceae	g__Gemmiger	s__Gemmiger variabilis_B	14	15	5	1	0	0	0	1	0
DHB-21_bin.40	d__Bacteria	p__Bacillota	c__Bacilli	o__RF39	f__UBA660	g__Onthousia	s__Onthousia sp014846175	2	2	2	1	0	1	0	1	0
DHB-21_bin.6	d__Bacteria	p__Bacillota	c__Clostridia	o__Lachnospirales	f__Lachnospiraceae	g__Blautia_A	s__Blautia_A difficilis	13	11	7	0	1	0	0	0	0
DHB-22_bin.19	d__Bacteria	p__Actinomycetota	c__Coriobacteriia	o__Coriobacteriales	f__Atopobiaceae	g__Parafannyhessea	s__Parafannyhessea sp902761955	8	4	8	1	0	0	0	0	0
DHB-22_bin.57	d__Bacteria	p__Bacillota	c__Negativicutes	o__Veillonellales	f__Megasphaeraceae	g__Megasphaera	s__Megasphaera elsdenii	7	7	8	1	0	1	0	0	0
DHB-22_bin.6	d__Bacteria	p__Bacillota	c__Clostridia	o__Lachnospirales	f__Lachnospiraceae	g__Blautia_A	s__Blautia_A sp018919065	16	17	11	1	0	0	0	1	0
DHB-22_bin.61	d__Bacteria	p__Bacillota	c__Bacilli	o__Erysipelotrichales	f__Erysipelotrichaceae	g__Bulleidia	s__Bulleidia intestinalis	13	6	11	1	0	1	0	0	0
DHB-23_bin.14	d__Bacteria	p__Bacillota	c__Bacilli	o__RF39	f__UBA660	g__UBA3789	s__UBA3789 sp934140575	0	3	3	1	0	0	0	0	0
DHB-23_bin.20	d__Bacteria	p__Bacillota	c__Clostridia	o__Oscillospirales	f__Oscillospiraceae	g__Faecousia	s__Faecousia sp945963595	10	12	4	1	0	1	0	0	0
DHB-23_bin.34	d__Bacteria	p__Bacillota	c__Clostridia	o__Lachnospirales	f__Lachnospiraceae	g__Oliverpabstia	s__Oliverpabstia sp004556655	13	26	8	1	1	1	0	0	0
DHB-23_bin.36	d__Bacteria	p__Bacillota	c__Clostridia	o__Lachnospirales	f__Lachnospiraceae	g__Blautia_A	s__Blautia_A sp029101305	12	20	10	0	1	1	0	0	0
DHB-24_bin.11	d__Bacteria	p__Bacillota	c__Clostridia	o__Peptostreptococcales	f__Anaerovoracaceae	g__Fimisoma	s__Fimisoma sp002320005	3	4	4	2	0	1	0	2	0
DHB-24_bin.32	d__Bacteria	p__Bacillota	c__Clostridia	o__Lachnospirales	f__Lachnospiraceae	g__Anaerostipes	s__Anaerostipes hadrus	10	7	4	1	0	1	0	2	0
DHB-24_bin.46	d__Bacteria	p__Bacillota	c__Bacilli	o__RF39	f__UBA660	g__Onthousia	s__Onthousia sp000438295	2	1	1	2	0	0	0	0	0
DHB-28_bin.12	d__Bacteria	p__Bacillota	c__Clostridia	o__Oscillospirales	f__Ruminococcaceae	g__Gemmiger	s__Gemmiger qucibialis	11	25	4	1	0	0	0	0	0
DHB-28_bin.16	d__Bacteria	p__Bacillota	c__Clostridia	o__Lachnospirales	f__Lachnospiraceae	g__Oliverpabstia	s__Oliverpabstia sp004556655	17	24	7	1	1	1	0	0	0
DHB-28_bin.19	d__Bacteria	p__Bacillota	c__Clostridia	o__Oscillospirales	f__Acutalibacteraceae	g__Fimivicinus	s__Fimivicinus sp002320555	7	11	4	1	0	1	0	1	0
DHB-28_bin.3	d__Bacteria	p__Bacillota	c__Clostridia	o__Oscillospirales	f__Oscillospiraceae	g__Pelethomonas	s__Pelethomonas sp017887695	7	5	1	2	0	0	0	0	1
DHB-28_bin.44	d__Bacteria	p__Bacillota	c__Clostridia	o__Eubacteriales	f__Eubacteriaceae	g__Eubacterium	s__Eubacterium maltosivorans	8	16	16	1	0	1	0	1	0
DHB-28_bin.6	d__Bacteria	p__Bacillota	c__Clostridia	o__Peptostreptococcales	f__Anaerovoracaceae	g__RGIG7179	s__RGIG7179 sp016302925	4	7	5	1	0	2	0	0	0
DHB-29_bin.6	d__Bacteria	p__Bacillota	c__Clostridia	o__Oscillospirales	f__Acutalibacteraceae	g__Limousia	s__Limousia pullorum	11	7	4	1	0	0	0	0	0
DHB-3_bin.17	d__Bacteria	p__Bacillota	c__Clostridia	o__Oscillospirales	f__Ruminococcaceae	g__Merdivicinus	s__Merdivicinus sp905214265	4	23	2	1	0	3	0	0	0
DHB-3_bin.59	d__Bacteria	p__Bacillota	c__Clostridia	o__Lachnospirales	f__Lachnospiraceae	g__JAFBIX01	s__JAFBIX01 sp021531895	6	4	6	1	0	1	0	1	0
DHB-30_bin.23	d__Bacteria	p__Bacillota	c__Clostridia	o__Lachnospirales	f__Lachnospiraceae	g__Schaedlerella	s__Schaedlerella sp905203555	9	13	4	1	0	0	0	1	0
DHB-30_bin.6	d__Bacteria	p__Bacteroidota	c__Bacteroidia	o__Bacteroidales	f__UBA932	g__Cryptobacteroides	s__Cryptobacteroides sp004552615	6	10	10	1	0	0	0	0	0
DHB-31_bin.23	d__Bacteria	p__Bacteroidota	c__Bacteroidia	o__Bacteroidales	f__Bacteroidaceae	g__Bacteroides	s__Bacteroides xylanisolvens	7	18	16	1	0	0	0	1	0
DHB-31_bin.25	d__Bacteria	p__Bacillota	c__Bacilli	o__Erysipelotrichales	f__Erysipelotrichaceae	g__Faecalicoccus	s__Faecalicoccus sp900546545	21	2	4	1	0	0	0	2	0
DHB-31_bin.29	d__Bacteria	p__Actinomycetota	c__Actinomycetes	o__Actinomycetales	f__Bifidobacteriaceae	g__Bifidobacterium	s__Bifidobacterium globosum	11	5	9	1	0	0	0	1	1
DHB-31_bin.35	d__Bacteria	p__Actinomycetota	c__Coriobacteriia	o__Coriobacteriales	f__Atopobiaceae	g__UBA7741	s__UBA7741 sp900314575	8	9	12	1	0	0	0	1	0
DHB-31_bin.50	d__Bacteria	p__Bacillota	c__Bacilli	o__Lactobacillales	f__Lactobacillaceae	g__Lactobacillus	s__Lactobacillus sp910589675	30	2	6	0	2	0	0	0	0
DHB-31_bin.64	d__Bacteria	p__Actinomycetota	c__Actinomycetes	o__Actinomycetales	f__Bifidobacteriaceae	g__Bifidobacterium	s__Bifidobacterium longum	9	9	6	1	0	0	0	0	1
DHB-31_bin.7	d__Bacteria	p__Bacteroidota	c__Bacteroidia	o__Bacteroidales	f__Bacteroidaceae	g__Bacteroides	s__Bacteroides uniformis	6	26	13	1	0	4	0	1	0
DHB-33_bin.26	d__Bacteria	p__Bacillota	c__Clostridia	o__Lachnospirales	f__Lachnospiraceae	g__Mediterraneibacter	s__Mediterraneibacter faecis	11	10	3	0	1	0	0	0	0
DHB-33_bin.3	d__Bacteria	p__Bacillota	c__Clostridia	o__Oscillospirales	f__Oscillospiraceae	g__Intestinimonas	s__Intestinimonas aquisgranensis	11	18	7	1	0	1	0	2	0
DHB-33_bin.37	d__Bacteria	p__Bacillota	c__Clostridia	o__Oscillospirales	f__Oscillospiraceae	g__Flavonifractor	s__Flavonifractor sp017811815	9	11	4	2	0	1	0	0	0
DHB-33_bin.44	d__Bacteria	p__Bacteroidota	c__Bacteroidia	o__Bacteroidales	f__Muribaculaceae	g__Limisoma	s__Limisoma sp000437795	5	9	6	1	0	2	0	1	0
DHB-34_bin.17	d__Bacteria	p__Bacillota	c__Clostridia	o__TANB77	f__CAG-508	g__CAG-269	s__CAG-269 sp934141555	2	3	3	1	0	0	0	0	0
DHB-34_bin.26	d__Bacteria	p__Bacillota	c__Clostridia	o__Oscillospirales	f__Oscillospiraceae	g__CAG-170	s__CAG-170 sp900553545	8	10	5	1	0	1	0	1	0
DHB-34_bin.7	d__Bacteria	p__Bacillota	c__Clostridia	o__Oscillospirales	f__Oscillospiraceae	g__Oscillibacter	s__Oscillibacter sp900548505	7	11	8	1	0	2	0	1	1
DHB-35_bin.13	d__Bacteria	p__Bacillota	c__Negativicutes	o__Acidaminococcales	f__Acidaminococcaceae	g__Acidaminococcus	s__Acidaminococcus fermentans	6	10	11	1	0	1	0	2	0
DHB-35_bin.14	d__Bacteria	p__Bacteroidota	c__Bacteroidia	o__Bacteroidales	f__Muribaculaceae	g__CALZFJ01	s__CALZFJ01 sp945645715	4	12	6	1	0	1	0	0	0
DHB-36_bin.23	d__Bacteria	p__Bacteroidota	c__Bacteroidia	o__Bacteroidales	f__Bacteroidaceae	g__Bacteroides	s__Bacteroides uniformis	6	25	15	1	0	5	0	0	0
DHB-36_bin.31	d__Bacteria	p__Bacillota	c__Clostridia	o__Oscillospirales	f__Oscillospiraceae	g__F23-B02	s__F23-B02 sp001916715	6	8	3	0	1	0	0	1	0
DHB-36_bin.33	d__Bacteria	p__Bacillota	c__Clostridia	o__Lachnospirales	f__Lachnospiraceae	g__Blautia_A	s__Blautia_A sp018919065	17	20	13	1	0	1	0	0	0
DHB-36_bin.39	d__Bacteria	p__Bacillota	c__Clostridia	o__Peptostreptococcales	f__Anaerovoracaceae	g__Fimisoma	s__Fimisoma sp002320005	4	5	4	2	0	1	0	0	0
DHB-4_bin.12	d__Bacteria	p__Bacillota	c__Clostridia	o__Oscillospirales	f__Ruminococcaceae	g__Gemmiger	s__Gemmiger sp004561545	10	14	4	1	0	0	0	0	0
DHB-4_bin.60	d__Bacteria	p__Bacillota	c__Clostridia	o__Oscillospirales	f__Ruminococcaceae	g__UMGS1668	s__UMGS1668 sp004556975	3	2	3	1	0	0	0	0	0
DHB-40_bin.40	d__Bacteria	p__Bacillota	c__Clostridia	o__Peptostreptococcales	f__Peptostreptococcaceae	g__Terrisporobacter	s__Terrisporobacter sp022782605	14	6	8	1	0	0	0	0	0
DHB-40_bin.5	d__Bacteria	p__Bacillota	c__Clostridia	o__Oscillospirales	f__Ruminococcaceae	g__Gemmiger	s__Gemmiger sp945830575	15	13	4	1	0	0	0	0	0
DHB-40_bin.83	d__Bacteria	p__Bacillota	c__Bacilli	o__Lactobacillales	f__Lactobacillaceae	g__Lactobacillus	s__Lactobacillus sp910589675	25	1	5	0	2	0	0	0	0
DHB-5_bin.11	d__Bacteria	p__Bacillota	c__Clostridia	o__Oscillospirales	f__Ruminococcaceae	g__Gemmiger	s__Gemmiger sp004561545	10	12	4	1	0	0	0	0	0
DHB-5_bin.26	d__Bacteria	p__Bacillota	c__Clostridia	o__Oscillospirales	f__Oscillospiraceae	g__Pseudoflavonifractor_A	s__Pseudoflavonifractor_A sp022772585	10	8	3	1	0	1	0	1	0
DHB-5_bin.28	d__Bacteria	p__Bacillota	c__Clostridia	o__Lachnospirales	f__Lachnospiraceae	g__JAFBIX01	s__JAFBIX01 sp021531895	8	11	9	1	0	1	0	1	0
DHB-5_bin.41	d__Bacteria	p__Bacillota	c__Clostridia	o__Oscillospirales	f__Ruminococcaceae	g__Gemmiger	s__Gemmiger variabilis_B	19	17	4	2	0	0	0	0	0
DHB-5_bin.52	d__Bacteria	p__Bacillota	c__Clostridia	o__Lachnospirales	f__Lachnospiraceae	g__Acetatifactor	s__Acetatifactor intestinalis	9	15	7	1	0	1	0	0	0
DHB-6_bin.25	d__Bacteria	p__Bacillota	c__Clostridia	o__Oscillospirales	f__Butyricicoccaceae	g__Butyricicoccus_A	s__Butyricicoccus_A sp945872165	6	8	7	1	0	1	0	2	0
DHB-6_bin.33	d__Bacteria	p__Bacillota	c__Clostridia	o__Oscillospirales	f__Ruminococcaceae	g__Gemmiger	s__Gemmiger sp900554145	6	17	5	1	0	0	0	1	0
DHB-6_bin.44	d__Bacteria	p__Bacillota	c__Clostridia	o__Oscillospirales	f__Ruminococcaceae	g__Gemmiger	s__Gemmiger sp004561545	11	15	4	1	0	0	0	0	0
DHB-6_bin.51	d__Bacteria	p__Actinomycetota	c__Coriobacteriia	o__Coriobacteriales	f__Eggerthellaceae	g__Ellagibacter	s__Ellagibacter isourolithinifaciens	10	4	3	1	0	0	0	0	0
DHB-6_bin.62	d__Bacteria	p__Bacillota	c__Clostridia	o__TANB77	f__CAG-508	g__UMGS1994	s__UMGS1994 sp934130285	3	3	2	1	0	0	0	0	0
DHB-8_bin.27	d__Bacteria	p__Bacillota	c__Bacilli	o__Erysipelotrichales	f__Erysipelotrichaceae	g__Holdemanella	s__Holdemanella porci	6	1	3	1	0	0	0	0	0
DHB-8_bin.29	d__Bacteria	p__Bacillota	c__Clostridia	o__Oscillospirales	f__Ruminococcaceae	g__Porcipelethomonas	s__Porcipelethomonas sp002305725	8	8	18	0	0	12	1	0	0
DHB-8_bin.45	d__Bacteria	p__Bacteroidota	c__Bacteroidia	o__Bacteroidales	f__Bacteroidaceae	g__Physcousia	s__Physcousia sp900766785	4	6	6	1	0	2	0	1	0
DHB-8_bin.60	d__Bacteria	p__Bacillota	c__Bacilli	o__RF39	f__UBA660	g__Faecenecus	s__Faecenecus gallistercoris	2	2	3	1	0	0	0	0	0
DHB-9_bin.1	d__Bacteria	p__Bacillota	c__Bacilli	o__RF39	f__UBA660	g__Aphodocola	s__Aphodocola sp945969495	4	1	3	1	0	0	0	0	0
DHB-9_bin.25	d__Bacteria	p__Bacillota	c__Bacilli	o__RF39	f__UBA660	g__Onthousia	s__Onthousia sp014846175	3	1	1	1	0	1	0	0	0
DHB-9_bin.4	d__Bacteria	p__Bacillota	c__Bacilli	o__RF39	f__UBA660	g__CAG-1000	s__CAG-1000 sp000434555	4	2	3	1	0	0	0	1	0
ONT_hybrid_DHB_bins.100	d__Bacteria	p__Bacillota	c__Clostridia	o__Oscillospirales	f__Ruminococcaceae	g__CAG-115	s__CAG-115 sp004554555	5	14	16	1	0	1	1	1	0
ONT_hybrid_DHB_bins.103	d__Bacteria	p__Bacteroidota	c__Bacteroidia	o__Bacteroidales	f__Muribaculaceae	g__CALZFJ01	s__CALZFJ01 sp945645715	6	14	10	1	0	0	0	0	0
ONT_hybrid_DHB_bins.114	d__Bacteria	p__Pseudomonadota	c__Gammaproteobacteria	o__Burkholderiales	f__Rhodocyclaceae	g__SFHR01	s__SFHR01 sp004555545	3	4	6	1	0	0	0	0	0
ONT_hybrid_DHB_bins.116	d__Bacteria	p__Bacillota	c__Bacilli	o__RF39	f__UBA660	g__Scybalousia	s__Scybalousia sp900542735	0	2	3	1	0	0	0	1	0
ONT_hybrid_DHB_bins.119	d__Bacteria	p__Bacteroidota	c__Bacteroidia	o__Bacteroidales	f__UBA932	g__Cryptobacteroides	s__Cryptobacteroides sp000432655	2	8	5	1	0	0	0	0	0
ONT_hybrid_DHB_bins.123	d__Bacteria	p__Bacillota	c__Bacilli	o__RF39	f__UBA660	g__Onthousia	s__Onthousia sp029007415	2	2	2	2	0	0	0	0	0
ONT_hybrid_DHB_bins.125	d__Bacteria	p__Bacillota	c__Bacilli	o__RF39	f__UBA660	g__CAG-605	s__CAG-605 sp900545005	2	3	4	1	0	0	0	1	0
ONT_hybrid_DHB_bins.126	d__Bacteria	p__Bacillota	c__Clostridia	o__Peptostreptococcales	f__Anaerovoracaceae	g__Lentihominibacter	s__Lentihominibacter sp905193765	3	7	9	2	0	2	0	0	0
ONT_hybrid_DHB_bins.13	d__Bacteria	p__Bacillota	c__Clostridia	o__Oscillospirales	f__Ruminococcaceae	g__CAG-115	s__CAG-115 sp945873955	11	6	15	2	0	2	0	0	0
ONT_hybrid_DHB_bins.135	d__Bacteria	p__Bacillota	c__Clostridia	o__Lachnospirales	f__Lachnospiraceae	g__Blautia	s__Blautia pullistercoris	13	30	6	1	0	1	0	0	0
ONT_hybrid_DHB_bins.137	d__Bacteria	p__Bacteroidota	c__Bacteroidia	o__Bacteroidales	f__Bacteroidaceae	g__Alloprevotella	s__Alloprevotella sp004558535	4	4	9	1	0	0	0	0	0
ONT_hybrid_DHB_bins.138	d__Bacteria	p__Bacillota	c__Clostridia	o__Oscillospirales	f__Ruminococcaceae	g__Hominimerdicola	s__Hominimerdicola aceti	8	12	22	1	1	0	0	0	0
ONT_hybrid_DHB_bins.139	d__Bacteria	p__Bacillota	c__Clostridia	o__Oscillospirales	f__Ruminococcaceae	g__Faecivivens	s__Faecivivens sp029098085	2	22	2	2	0	1	0	0	0
ONT_hybrid_DHB_bins.148	d__Bacteria	p__Bacillota	c__Bacilli	o__RFN20	f__CAG-826	g__Onthovivens	s__Onthovivens sp016302065	6	5	6	1	0	0	0	0	0
ONT_hybrid_DHB_bins.151	d__Bacteria	p__Bacillota	c__Clostridia	o__Oscillospirales	f__Oscillospiraceae	g__CAG-170	s__CAG-170 sp900553545	8	12	5	1	0	0	0	0	0
ONT_hybrid_DHB_bins.155	d__Bacteria	p__Bacillota	c__Clostridia	o__Oscillospirales	f__Oscillospiraceae	g__F23-B02	s__F23-B02 sp004558025	4	5	3	0	1	0	0	0	0
ONT_hybrid_DHB_bins.157	d__Bacteria	p__Bacillota	c__Bacilli	o__Lactobacillales	f__Streptococcaceae	g__Streptococcus	s__Streptococcus orisratti	19	5	7	1	0	0	0	1	1
ONT_hybrid_DHB_bins.163	d__Bacteria	p__Bacillota	c__Bacilli	o__RF39	f__UBA660	g__CAG-710	s__CAG-710 sp000432595	1	1	3	1	0	0	0	1	0
ONT_hybrid_DHB_bins.164	d__Bacteria	p__Bacillota	c__Clostridia	o__Oscillospirales	f__Oscillospiraceae	g__JALEMS01	s__JALEMS01 sp022768185	6	8	2	1	0	1	0	0	0
ONT_hybrid_DHB_bins.165	d__Bacteria	p__Bacillota	c__Bacilli	o__RF39	f__UBA660	g__Aphodocola	s__Aphodocola sp945788325	3	2	4	1	0	0	0	1	0
ONT_hybrid_DHB_bins.167	d__Bacteria	p__Spirochaetota	c__Spirochaetia	o__Treponematales	f__Treponemataceae	g__Treponema_D	s__Treponema_D sp016293005	6	6	12	1	0	1	0	0	0
ONT_hybrid_DHB_bins.168	d__Bacteria	p__Bacillota	c__Clostridia	o__Oscillospirales	f__Oscillospiraceae	g__Hominicoprocola	s__Hominicoprocola sp900317525	6	7	3	1	0	1	0	0	0
ONT_hybrid_DHB_bins.169	d__Bacteria	p__Bacillota	c__Bacilli	o__RF39	f__UBA660	g__CAG-433	s__CAG-433 sp934141145	0	1	3	1	0	1	0	0	0
ONT_hybrid_DHB_bins.185	d__Bacteria	p__Bacillota	c__Clostridia	o__Lachnospirales	f__Lachnospiraceae	g__Faecalicatena	s__Faecalicatena contortus_B	19	19	13	1	1	2	0	1	0
ONT_hybrid_DHB_bins.189	d__Bacteria	p__Bacillota	c__Clostridia	o__Lachnospirales	f__Lachnospiraceae	g__Dorea	s__Dorea formicigenerans	14	9	2	1	1	1	0	2	0
ONT_hybrid_DHB_bins.196	d__Bacteria	p__Bacteroidota	c__Bacteroidia	o__Bacteroidales	f__Bacteroidaceae	g__Prevotella	s__Prevotella sp022773825	2	4	13	1	0	0	0	1	0
ONT_hybrid_DHB_bins.197	d__Bacteria	p__Bacillota	c__Clostridia	o__Oscillospirales	f__UBA644	g__UBA644	s__UBA644 sp002299265	4	8	5	0	1	0	0	0	0
ONT_hybrid_DHB_bins.2	d__Bacteria	p__Bacillota	c__Clostridia	o__Lachnospirales	f__Lachnospiraceae	g__Blautia_A	s__Blautia_A sp022764275	11	23	5	0	1	1	0	0	0
ONT_hybrid_DHB_bins.211	d__Bacteria	p__Bacillota	c__Clostridia	o__Lachnospirales	f__Lachnospiraceae	g__Blautia_A	s__Blautia_A sp945872375	15	21	10	1	0	0	0	0	0
ONT_hybrid_DHB_bins.213	d__Bacteria	p__Bacillota	c__Clostridia	o__HGM11327	f__HGM11327	g__SIG351	s__SIG351 sp945918795	6	10	4	3	0	0	0	0	1
ONT_hybrid_DHB_bins.217	d__Bacteria	p__Bacillota	c__Clostridia	o__Clostridiales	f__Clostridiaceae	g__Clostridium	s__Clostridium sp000435835	14	6	10	1	0	1	0	0	0
ONT_hybrid_DHB_bins.218	d__Bacteria	p__Bacillota	c__Clostridia	o__Lachnospirales	f__Lachnospiraceae	g__Roseburia	s__Roseburia sp902781225	10	12	12	1	0	0	0	0	0
ONT_hybrid_DHB_bins.220	d__Bacteria	p__Bacteroidota	c__Bacteroidia	o__Bacteroidales	f__Muribaculaceae	g__Lepagella	s__Lepagella sp905214735	5	6	10	2	0	1	0	0	0
ONT_hybrid_DHB_bins.227	d__Bacteria	p__Bacillota	c__Clostridia	o__Oscillospirales	f__Oscillospiraceae	g__HGM13010	s__HGM13010 sp022779345	2	9	4	1	0	1	0	0	0
ONT_hybrid_DHB_bins.23	d__Bacteria	p__Bacillota	c__Clostridia	o__Lachnospirales	f__Lachnospiraceae	g__Coprococcus	s__Coprococcus sp016297325	9	8	18	1	0	4	0	0	1
ONT_hybrid_DHB_bins.235	d__Bacteria	p__Spirochaetota	c__Spirochaetia	o__Sphaerochaetales	f__Sphaerochaetaceae	g__Ornithospirochaeta	s__Ornithospirochaeta sp022785155	8	11	8	1	0	0	0	0	0
ONT_hybrid_DHB_bins.237	d__Bacteria	p__Bacillota	c__Clostridia	o__Lachnospirales	f__Lachnospiraceae	g__SIG292	s__SIG292 sp022766905	5	12	6	1	0	3	0	0	0
ONT_hybrid_DHB_bins.239	d__Bacteria	p__Bacillota	c__Clostridia	o__Oscillospirales	f__Ruminococcaceae	g__Merdivicinus	s__Merdivicinus sp900555435	6	22	6	1	0	0	0	0	0
ONT_hybrid_DHB_bins.244	d__Bacteria	p__Bacillota	c__Clostridia	o__Peptostreptococcales	f__Anaerovoracaceae	g__CAKQOE01	s__CAKQOE01 sp934255545	4	9	10	2	0	1	0	0	0
ONT_hybrid_DHB_bins.246	d__Bacteria	p__Bacillota	c__Clostridia	o__Eubacteriales	f__Eubacteriaceae	g__Eubacterium	s__Eubacterium maltosivorans	9	17	15	1	0	2	0	0	0
ONT_hybrid_DHB_bins.25	d__Bacteria	p__Bacillota	c__Clostridia	o__Lachnospirales	f__Lachnospiraceae	g__Anthropogastromicrobium	s__Anthropogastromicrobium aceti	14	24	11	0	1	0	0	0	1
ONT_hybrid_DHB_bins.257	d__Bacteria	p__Bacteroidota	c__Bacteroidia	o__Bacteroidales	f__Bacteroidaceae	g__Bacteroides	s__Bacteroides fragilis	11	21	13	1	0	0	0	1	0
ONT_hybrid_DHB_bins.262	d__Bacteria	p__Bacteroidota	c__Bacteroidia	o__Bacteroidales	f__Muribaculaceae	g__CAG-873	s__CAG-873 sp016302215	6	4	4	1	0	2	0	1	0
ONT_hybrid_DHB_bins.263	d__Bacteria	p__Bacillota	c__Clostridia	o__Lachnospirales	f__Lachnospiraceae	g__Frisingicoccus	s__Frisingicoccus caecimuris	12	6	9	1	0	2	0	1	1
ONT_hybrid_DHB_bins.264	d__Bacteria	p__Bacillota	c__Clostridia	o__Lachnospirales	f__Lachnospiraceae	g__Blautia_A	s__Blautia_A sp021771755	14	10	4	1	0	0	0	0	0
ONT_hybrid_DHB_bins.27	d__Bacteria	p__Bacillota	c__Clostridia	o__Peptostreptococcales	f__Anaerovoracaceae	g__UMGS973	s__UMGS973 sp016293805	6	7	11	1	0	1	0	2	0
ONT_hybrid_DHB_bins.271	d__Bacteria	p__Bacillota	c__Clostridia	o__Oscillospirales	f__CAG-272	g__Flemingiibacterium	s__Flemingiibacterium sp900546315	5	22	9	1	0	3	0	1	0
ONT_hybrid_DHB_bins.272	d__Bacteria	p__Bacillota	c__Clostridia	o__Lachnospirales	f__Lachnospiraceae	g__JAFBIY01	s__JAFBIY01 sp021531975	7	8	2	1	0	0	0	1	0
ONT_hybrid_DHB_bins.282	d__Bacteria	p__Bacillota	c__Clostridia	o__Oscillospirales	f__Ruminococcaceae	g__Porcipelethomonas	s__Porcipelethomonas sp022788225	8	8	15	0	0	14	1	0	0
ONT_hybrid_DHB_bins.285	d__Bacteria	p__Bacillota	c__Negativicutes	o__Veillonellales	f__Megasphaeraceae	g__Caecibacter	s__Caecibacter sp003467125	7	8	13	1	0	1	0	1	0
ONT_hybrid_DHB_bins.301	d__Bacteria	p__Bacillota	c__Clostridia	o__Oscillospirales	f__Ruminococcaceae	g__UBA3818	s__UBA3818 sp900557155	4	6	4	2	0	0	0	1	0
ONT_hybrid_DHB_bins.320	d__Bacteria	p__Bacillota	c__Clostridia	o__Lachnospirales	f__Lachnospiraceae	g__Choladousia	s__Choladousia sp022776305	11	10	4	1	0	0	0	2	0
ONT_hybrid_DHB_bins.331	d__Bacteria	p__Bacillota	c__Bacilli	o__RF39	f__UBA660	g__Ventrenecus	s__Ventrenecus sp905205665	3	3	5	1	0	0	0	1	0
ONT_hybrid_DHB_bins.333	d__Bacteria	p__Bacillota	c__Clostridia	o__TANB77	f__CAG-508	g__UMGS1864	s__UMGS1864 sp900555835	2	2	1	1	0	0	0	0	0
ONT_hybrid_DHB_bins.345	d__Bacteria	p__Bacillota	c__Bacilli	o__Lactobacillales	f__Streptococcaceae	g__Streptococcus	s__Streptococcus ferus	20	2	8	1	0	0	0	0	2
ONT_hybrid_DHB_bins.346	d__Bacteria	p__Bacillota	c__Clostridia	o__Lachnospirales	f__Lachnospiraceae	g__Dorea_A	s__Dorea_A sp022769185	12	13	6	1	1	2	0	0	0
ONT_hybrid_DHB_bins.348	d__Bacteria	p__Bacillota	c__Clostridia	o__Oscillospirales	f__Acutalibacteraceae	g__UBA6857	s__UBA6857 sp945863885	5	9	6	1	0	0	0	0	0
ONT_hybrid_DHB_bins.350	d__Bacteria	p__Bacillota	c__Clostridia	o__Oscillospirales	f__Ruminococcaceae	g__Pygmaiobacter	s__Pygmaiobacter massiliensis_A	4	6	6	2	0	0	0	2	0
ONT_hybrid_DHB_bins.351	d__Bacteria	p__Bacteroidota	c__Bacteroidia	o__Bacteroidales	f__Bacteroidaceae	g__Alloprevotella	s__Alloprevotella sp004552865	4	4	7	1	0	0	0	1	0
ONT_hybrid_DHB_bins.363	d__Bacteria	p__Bacillota	c__Clostridia	o__Oscillospirales	f__Ruminococcaceae	g__Ruminococcus_C	s__Ruminococcus_C sp000433635	9	7	15	0	0	11	1	0	0
ONT_hybrid_DHB_bins.369	d__Bacteria	p__Bacillota	c__Clostridia	o__Oscillospirales	f__Ruminococcaceae	g__UBA3818	s__UBA3818 sp002369315	5	5	4	1	0	0	0	1	0
ONT_hybrid_DHB_bins.370	d__Bacteria	p__Bacillota	c__Bacilli	o__RF39	f__UBA660	g__CAG-1000	s__CAG-1000 sp004552445	4	4	2	1	0	0	0	1	0
ONT_hybrid_DHB_bins.386	d__Bacteria	p__Bacteroidota	c__Bacteroidia	o__Bacteroidales	f__Bacteroidaceae	g__Physcousia	s__Physcousia sp945865175	6	6	13	2	0	3	0	0	0
ONT_hybrid_DHB_bins.387	d__Bacteria	p__Bacteroidota	c__Bacteroidia	o__Bacteroidales	f__Paludibacteraceae	g__UBA4363	s__UBA4363 sp017937025	6	3	10	1	0	1	0	0	0
ONT_hybrid_DHB_bins.403	d__Bacteria	p__Actinomycetota	c__Coriobacteriia	o__Coriobacteriales	f__Coriobacteriaceae	g__Collinsella	s__Collinsella provencensis	9	5	7	1	0	0	0	0	0
ONT_hybrid_DHB_bins.409	d__Bacteria	p__Bacillota	c__Clostridia	o__HGM11514	f__HGM11514	g__CAKSKB01	s__CAKSKB01 sp902492655	4	14	4	0	1	0	0	0	0
ONT_hybrid_DHB_bins.415	d__Bacteria	p__Bacillota	c__Bacilli	o__RF39	f__UBA660	g__HGM10857	s__HGM10857 sp900557305	4	3	6	2	0	0	0	1	0
ONT_hybrid_DHB_bins.422	d__Bacteria	p__Bacillota	c__Bacilli	o__RF39	f__UBA660	g__CAJOJO01	s__CAJOJO01 sp014845975	1	1	3	1	0	0	0	0	1
ONT_hybrid_DHB_bins.428	d__Bacteria	p__Bacillota	c__Bacilli	o__Lactobacillales	f__Streptococcaceae	g__Streptococcus	s__Streptococcus porcorum	12	3	8	1	0	0	0	0	1
ONT_hybrid_DHB_bins.43	d__Bacteria	p__Bacillota	c__Clostridia	o__Oscillospirales	f__Oscillospiraceae	g__Oscillibacter	s__Oscillibacter segnis	5	8	6	1	0	0	0	0	2
ONT_hybrid_DHB_bins.430	d__Bacteria	p__Bacillota	c__Bacilli	o__RF39	f__UBA660	g__CAG-605	s__CAG-605 sp000433255	1	2	5	1	0	0	0	1	0
ONT_hybrid_DHB_bins.44	d__Bacteria	p__Bacillota	c__Bacilli	o__RF39	f__UBA660	g__CAG-533	s__CAG-533 sp900553855	1	2	5	1	0	0	0	1	0
ONT_hybrid_DHB_bins.441	d__Bacteria	p__Bacteroidota	c__Bacteroidia	o__Bacteroidales	f__Bacteroidaceae	g__Bacteroides	s__Bacteroides thetaiotaomicron	6	21	11	1	0	0	0	0	0
ONT_hybrid_DHB_bins.444	d__Bacteria	p__Bacillota	c__Clostridia	o__Oscillospirales	f__Ruminococcaceae	g__Ruminococcus	s__Ruminococcus sp945910815	8	6	16	0	1	13	1	0	0
ONT_hybrid_DHB_bins.45	d__Bacteria	p__Bacillota	c__Bacilli	o__RF39	f__UBA660	g__CAG-1193	s__CAG-1193 sp934130375	1	2	3	2	0	0	0	1	0
ONT_hybrid_DHB_bins.452	d__Bacteria	p__Bacillota	c__Clostridia	o__Clostridiales	f__Clostridiaceae	g__Clostridium	s__Clostridium sp900543325	15	7	13	1	0	0	0	0	0
ONT_hybrid_DHB_bins.454	d__Bacteria	p__Bacillota	c__Clostridia	o__Peptostreptococcales	f__Anaerovoracaceae	g__RGIG7179	s__RGIG7179 sp016302925	8	12	7	1	0	2	0	0	0
ONT_hybrid_DHB_bins.469	d__Bacteria	p__Bacillota	c__Bacilli	o__RF39	f__UBA660	g__UMGS1124	s__UMGS1124 sp900548725	2	2	2	1	0	0	0	1	0
ONT_hybrid_DHB_bins.47	d__Bacteria	p__Bacillota	c__Bacilli	o__Lactobacillales	f__Streptococcaceae	g__Streptococcus	s__Streptococcus criceti	17	1	5	1	0	0	0	0	1
ONT_hybrid_DHB_bins.476	d__Bacteria	p__Bacteroidota	c__Bacteroidia	o__Bacteroidales	f__Bacteroidaceae	g__Phocaeicola	s__Phocaeicola coprophilus	8	9	12	1	0	1	0	1	1
ONT_hybrid_DHB_bins.483	d__Bacteria	p__Bacillota	c__Clostridia	o__Oscillospirales	f__Oscillospiraceae	g__Pseudoflavonifractor	s__Pseudoflavonifractor sp902362925	3	28	5	1	0	0	0	0	0
ONT_hybrid_DHB_bins.498	d__Bacteria	p__Bacillota	c__Clostridia	o__Lachnospirales	f__Lachnospiraceae	g__Eubacterium_F	s__Eubacterium_F sp022767895	4	8	9	1	0	3	0	0	0
ONT_hybrid_DHB_bins.499	d__Bacteria	p__Bacillota	c__Clostridia	o__Peptostreptococcales	f__Anaerovoracaceae	g__Lentihominibacter	s__Lentihominibacter butyricus	2	8	6	2	0	1	0	0	0
ONT_hybrid_DHB_bins.5	d__Bacteria	p__Bacillota	c__Clostridia	o__Oscillospirales	f__Ruminococcaceae	g__Angelakisella	s__Angelakisella sp003453215	6	5	3	1	0	0	0	1	0
ONT_hybrid_DHB_bins.50	d__Bacteria	p__Bacillota	c__Clostridia	o__Oscillospirales	f__Ruminococcaceae	g__Gemmiger	s__Gemmiger sp900554145	10	20	4	1	0	0	0	0	0
ONT_hybrid_DHB_bins.504	d__Bacteria	p__Bacillota	c__Clostridia	o__Oscillospirales	f__Oscillospiraceae	g__Lawsonibacter	s__Lawsonibacter sp000177015	8	12	6	1	0	0	0	1	1
ONT_hybrid_DHB_bins.523	d__Bacteria	p__Bacillota	c__Clostridia	o__Lachnospirales	f__Lachnospiraceae	g__W0P33-017	s__W0P33-017 sp022768825	14	7	13	1	0	2	0	0	0
ONT_hybrid_DHB_bins.528	d__Bacteria	p__Bacillota	c__Bacilli	o__RF39	f__UBA660	g__SIG204	s__SIG204 sp900544605	1	2	3	2	0	0	0	1	0
ONT_hybrid_DHB_bins.530	d__Bacteria	p__Bacillota	c__Clostridia	o__Oscillospirales	f__Ruminococcaceae	g__Gemmiger	s__Gemmiger variabilis_B	18	20	4	1	0	0	0	0	0
ONT_hybrid_DHB_bins.534	d__Bacteria	p__Bacillota	c__Clostridia	o__Oscillospirales	f__Oscillospiraceae	g__Flavonifractor	s__Flavonifractor sp017811815	6	5	8	1	0	1	0	0	0
ONT_hybrid_DHB_bins.535	d__Bacteria	p__Bacillota	c__Bacilli	o__RFN20	f__CAG-826	g__Fiminaster	s__Fiminaster sp022777645	4	11	2	1	0	1	0	0	0
ONT_hybrid_DHB_bins.541	d__Bacteria	p__Bacillota	c__Clostridia	o__Peptostreptococcales	f__Peptostreptococcaceae	g__Romboutsia	s__Romboutsia timonensis	11	16	7	1	0	0	0	0	0
ONT_hybrid_DHB_bins.544	d__Bacteria	p__Bacillota	c__Clostridia	o__Lachnospirales	f__Anaerotignaceae	g__Anaerotignum	s__Anaerotignum lactatifermentans	4	7	6	2	0	1	0	0	1
ONT_hybrid_DHB_bins.546	d__Bacteria	p__Bacillota	c__Bacilli	o__RF39	f__UBA660	g__CAG-1000	s__CAG-1000 sp000436975	3	3	3	1	0	0	0	0	0
ONT_hybrid_DHB_bins.55	d__Bacteria	p__Bacteroidota	c__Bacteroidia	o__Bacteroidales	f__Bacteroidaceae	g__Bacteroides	s__Bacteroides sp945641355	6	18	13	1	0	1	0	0	0
ONT_hybrid_DHB_bins.557	d__Bacteria	p__Bacillota	c__Clostridia	o__Oscillospirales	f__Ruminococcaceae	g__UMGS1668	s__UMGS1668 sp004556975	6	4	3	1	0	0	0	0	0
ONT_hybrid_DHB_bins.562	d__Bacteria	p__Bacillota	c__Bacilli	o__RF39	f__UBA660	g__HGM10766	s__HGM10766 sp900757295	1	3	5	1	0	0	0	1	0
ONT_hybrid_DHB_bins.577	d__Bacteria	p__Bacillota	c__Clostridia	o__Lachnospirales	f__Lachnospiraceae	g__Blautia_A	s__Blautia_A obeum	15	13	3	0	1	1	0	0	0
ONT_hybrid_DHB_bins.58	d__Bacteria	p__Bacillota	c__Negativicutes	o__Acidaminococcales	f__Acidaminococcaceae	g__Succiniclasticum	s__Succiniclasticum sp900314855	6	2	7	1	0	0	0	2	0
ONT_hybrid_DHB_bins.583	d__Bacteria	p__Bacteroidota	c__Bacteroidia	o__Bacteroidales	f__Muribaculaceae	g__SFTJ01	s__SFTJ01 sp004557385	6	9	8	1	0	1	0	0	0
ONT_hybrid_DHB_bins.599	d__Bacteria	p__Bacillota	c__Bacilli	o__Erysipelotrichales	f__Coprobacillaceae	g__Faecalibacillus	s__Faecalibacillus sp945981915	42	6	12	1	0	0	0	0	0
ONT_hybrid_DHB_bins.607	d__Bacteria	p__Bacillota	c__Bacilli	o__Erysipelotrichales	f__Erysipelotrichaceae	g__Bulleidia	s__Bulleidia intestinalis	15	6	12	1	0	1	0	0	0
ONT_hybrid_DHB_bins.61	d__Bacteria	p__Bacillota	c__Clostridia	o__Oscillospirales	f__Oscillospiraceae	g__Flavonifractor	s__Flavonifractor plautii	10	14	3	1	0	0	0	0	0
ONT_hybrid_DHB_bins.614	d__Bacteria	p__Bacillota	c__Clostridia	o__Oscillospirales	f__Ruminococcaceae	g__Gemmiger	s__Gemmiger formicilis	10	16	3	1	0	0	0	0	0
ONT_hybrid_DHB_bins.626	d__Bacteria	p__Bacillota	c__Clostridia	o__Eubacteriales	f__Anaerofustaceae	g__Anaerofustis	s__Anaerofustis stercorihominis_A	6	3	9	2	0	0	0	0	1
ONT_hybrid_DHB_bins.627	d__Bacteria	p__Bacillota	c__Bacilli	o__RF39	f__UBA660	g__UMGS1124	s__UMGS1124 sp934086185	2	2	3	1	0	0	0	0	0
ONT_hybrid_DHB_bins.636	d__Bacteria	p__Bacillota	c__Clostridia	o__Oscillospirales	f__Oscillospiraceae	g__Intestinimonas	s__Intestinimonas butyriciproducens	11	14	5	2	0	2	0	1	1
ONT_hybrid_DHB_bins.649	d__Bacteria	p__Bacillota	c__Clostridia	o__Oscillospirales	f__Butyricicoccaceae	g__UBA4644	s__UBA4644 sp029099685	2	14	3	1	0	0	0	0	0
ONT_hybrid_DHB_bins.657	d__Bacteria	p__Bacillota	c__Clostridia	o__Oscillospirales	f__Ruminococcaceae	g__Gemmiger	s__Gemmiger sp945830575	12	25	2	2	0	0	0	0	0
ONT_hybrid_DHB_bins.665	d__Bacteria	p__Bacillota	c__Clostridia	o__Peptostreptococcales	f__Anaerovoracaceae	g__Lentihominibacter	s__Lentihominibacter sp934281605	5	6	5	2	0	1	0	1	1
ONT_hybrid_DHB_bins.667	d__Bacteria	p__Bacillota	c__Clostridia	o__Oscillospirales	f__Butyricicoccaceae	g__Pseudobutyricicoccus	s__Pseudobutyricicoccus sp019420045	4	5	3	1	0	0	0	2	0
ONT_hybrid_DHB_bins.674	d__Bacteria	p__Bacteroidota	c__Bacteroidia	o__Bacteroidales	f__Muribaculaceae	g__Limisoma	s__Limisoma sp004561555	5	11	6	1	0	1	0	0	1
ONT_hybrid_DHB_bins.676	d__Bacteria	p__Bacillota	c__Clostridia	o__Oscillospirales	f__Oscillospiraceae	g__Vermiculatibacterium	s__Vermiculatibacterium sp900169975	10	12	5	1	0	1	0	0	0
ONT_hybrid_DHB_bins.68	d__Bacteria	p__Bacillota	c__Clostridia	o__Lachnospirales	f__Lachnospiraceae	g__CAG-632	s__CAG-632 sp000431515	6	6	13	1	0	3	0	1	0
ONT_hybrid_DHB_bins.691	d__Bacteria	p__Bacillota	c__Clostridia	o__Oscillospirales	f__Ruminococcaceae	g__Paludihabitans	s__Paludihabitans sp900543295	5	10	7	1	0	7	0	0	0
ONT_hybrid_DHB_bins.696	d__Bacteria	p__Bacteroidota	c__Bacteroidia	o__Bacteroidales	f__Tannerellaceae	g__Parabacteroides	s__Parabacteroides sp004562445	6	12	8	1	0	1	0	0	0
ONT_hybrid_DHB_bins.698	d__Bacteria	p__Bacillota	c__Clostridia	o__Lachnospirales	f__Lachnospiraceae	g__Bacteroides_F	s__Bacteroides_F sp945913015	9	9	8	1	0	0	0	0	0
ONT_hybrid_DHB_bins.700	d__Bacteria	p__Bacteroidota	c__Bacteroidia	o__Bacteroidales	f__Bacteroidaceae	g__Prevotella	s__Prevotella sp002251295	5	13	19	1	0	2	0	0	0
ONT_hybrid_DHB_bins.702	d__Bacteria	p__Bacillota	c__Clostridia	o__Lachnospirales	f__Lachnospiraceae	g__Dorea_A	s__Dorea_A longicatena	6	8	6	1	0	1	0	0	0
ONT_hybrid_DHB_bins.704	d__Bacteria	p__Bacillota	c__Clostridia	o__Clostridiales	f__Clostridiaceae	g__Clostridium	s__Clostridium sp023399035	15	3	13	1	0	1	0	0	0
ONT_hybrid_DHB_bins.705	d__Bacteria	p__Bacillota	c__Clostridia	o__Christensenellales	f__Aristaeellaceae	g__Fimadaptatus	s__Fimadaptatus sp948467645	5	24	9	3	0	1	0	0	0
ONT_hybrid_DHB_bins.707	d__Bacteria	p__Spirochaetota	c__Spirochaetia	o__Sphaerochaetales	f__Sphaerochaetaceae	g__Bullifex	s__Bullifex sp022788185	11	13	9	1	0	0	0	0	0
ONT_hybrid_DHB_bins.709	d__Bacteria	p__Bacillota	c__Clostridia	o__Lachnospirales	f__Lachnospiraceae	g__Dorea_D	s__Dorea_D sp000433535	10	6	3	1	0	0	0	0	0
ONT_hybrid_DHB_bins.713	d__Bacteria	p__Bacillota	c__Clostridia	o__Lachnospirales	f__Lachnospiraceae	g__Anaerostipes	s__Anaerostipes faecalis	11	6	8	1	0	2	0	0	0
ONT_hybrid_DHB_bins.722	d__Bacteria	p__Bacillota	c__Clostridia	o__Lachnospirales	f__Anaerotignaceae	g__Metalachnospira	s__Metalachnospira sp029098265	5	6	9	1	0	1	0	1	1
ONT_hybrid_DHB_bins.728	d__Bacteria	p__Bacillota	c__Clostridia	o__Lachnospirales	f__Lachnospiraceae	g__Claveliimonas	s__Claveliimonas sp019423745	7	9	5	1	0	0	0	0	0
ONT_hybrid_DHB_bins.736	d__Bacteria	p__Bacillota	c__Negativicutes	o__Veillonellales	f__Megasphaeraceae	g__Megasphaera	s__Megasphaera elsdenii	9	7	8	1	0	1	0	1	0
ONT_hybrid_DHB_bins.738	d__Bacteria	p__Bacillota	c__Clostridia	o__Oscillospirales	f__Butyricicoccaceae	g__Butyricicoccus_A	s__Butyricicoccus_A sp945872165	7	9	7	1	0	0	0	2	0
ONT_hybrid_DHB_bins.74	d__Bacteria	p__Bacillota	c__Clostridia	o__Oscillospirales	f__Ruminococcaceae	g__Gemmiger	s__Gemmiger sp900545545	18	18	3	1	0	2	0	0	0
ONT_hybrid_DHB_bins.742	d__Bacteria	p__Bacillota	c__Bacilli	o__RF39	f__UBA660	g__UBA3789	s__UBA3789 sp900543055	2	2	2	2	0	0	0	0	0
ONT_hybrid_DHB_bins.744	d__Bacteria	p__Bacillota	c__Clostridia	o__Lachnospirales	f__Lachnospiraceae	g__UBA2882	s__UBA2882 sp017626095	7	11	10	1	0	2	0	0	0
ONT_hybrid_DHB_bins.747	d__Bacteria	p__Actinomycetota	c__Coriobacteriia	o__Coriobacteriales	f__Atopobiaceae	g__Parafannyhessea	s__Parafannyhessea sp902761955	11	7	8	1	0	0	0	0	0
ONT_hybrid_DHB_bins.749	d__Bacteria	p__Bacillota	c__Bacilli	o__RF39	f__UBA660	g__CAG-605	s__CAG-605 sp000433475	3	2	4	1	0	0	0	1	0
ONT_hybrid_DHB_bins.751	d__Bacteria	p__Bacteroidota	c__Bacteroidia	o__Bacteroidales	f__Bacteroidaceae	g__Bacteroides	s__Bacteroides sp945836915	5	8	8	1	0	1	0	0	0
ONT_hybrid_DHB_bins.756	d__Bacteria	p__Bacillota	c__Bacilli	o__RF39	f__UBA660	g__RUG14121	s__RUG14121 sp016297695	2	2	6	1	0	0	0	0	0
ONT_hybrid_DHB_bins.757	d__Bacteria	p__Bacillota	c__Clostridia	o__Peptostreptococcales	f__Anaerovoracaceae	g__Lentihominibacter	s__Lentihominibacter sp022763735	2	6	7	1	0	2	0	0	0
ONT_hybrid_DHB_bins.758	d__Bacteria	p__Bacillota	c__Clostridia	o__Oscillospirales	f__Oscillospiraceae	g__Avoscillospira	s__Avoscillospira sp945864925	11	11	7	0	1	0	0	0	0
ONT_hybrid_DHB_bins.76	d__Bacteria	p__Bacillota	c__Peptococcia	o__Peptococcales	f__Peptococcaceae	g__UMGS1590	s__UMGS1590 sp937976375	4	6	5	1	0	1	0	1	0
ONT_hybrid_DHB_bins.763	d__Bacteria	p__Bacillota	c__Bacilli	o__RF39	f__UBA660	g__CAG-433	s__CAG-433 sp000433675	2	1	4	1	0	0	0	1	0
ONT_hybrid_DHB_bins.764	d__Bacteria	p__Actinomycetota	c__Coriobacteriia	o__Coriobacteriales	f__Eggerthellaceae	g__JAQXVU01	s__JAQXVU01 sp029225085	5	6	7	1	0	0	0	0	0
ONT_hybrid_DHB_bins.77	d__Bacteria	p__Bacillota	c__Bacilli	o__MOL361	f__Turicibacteraceae	g__Turicibacter	s__Turicibacter bilis	17	8	9	2	0	1	0	1	0
ONT_hybrid_DHB_bins.770	d__Bacteria	p__Bacillota	c__Bacilli	o__RF39	f__UBA660	g__UMGS1124	s__UMGS1124 sp934089255	1	1	1	2	0	0	0	0	0
ONT_hybrid_DHB_bins.773	d__Bacteria	p__Bacillota	c__Clostridia	o__Oscillospirales	f__Oscillospiraceae	g__Instestinimonas_A	s__Instestinimonas_A celer	8	8	6	1	0	2	0	0	0
ONT_hybrid_DHB_bins.776	d__Bacteria	p__Bacillota	c__Clostridia	o__Oscillospirales	f__Oscillospiraceae	g__Intestinimonas	s__Intestinimonas massiliensis	8	15	10	1	0	2	0	0	0
ONT_hybrid_DHB_bins.781	d__Bacteria	p__Bacteroidota	c__Bacteroidia	o__Bacteroidales	f__Bacteroidaceae	g__Prevotella	s__Prevotella sp945837185	5	13	11	1	0	1	0	0	0
ONT_hybrid_DHB_bins.782	d__Bacteria	p__Bacillota	c__Clostridia	o__Lachnospirales	f__Lachnospiraceae	g__UBA4285	s__UBA4285 sp022769005	5	4	7	1	0	1	0	0	0
ONT_hybrid_DHB_bins.786	d__Bacteria	p__Bacillota	c__Clostridia	o__Lachnospirales	f__Lachnospiraceae	g__Choladousia	s__Choladousia sp029225485	9	19	11	2	0	1	0	1	0
ONT_hybrid_DHB_bins.788	d__Bacteria	p__Bacillota	c__Clostridia	o__Oscillospirales	f__Oscillospiraceae	g__Pseudoflavonifractor_A	s__Pseudoflavonifractor_A sp022772585	11	7	4	1	0	1	0	0	0
ONT_hybrid_DHB_bins.789	d__Bacteria	p__Bacteroidota	c__Bacteroidia	o__Bacteroidales	f__Bacteroidaceae	g__Phocaeicola	s__Phocaeicola plebeius_B	6	12	10	1	0	1	0	0	0
ONT_hybrid_DHB_bins.79	d__Bacteria	p__Bacillota	c__Clostridia	o__Lachnospirales	f__Lachnospiraceae	g__Limivivens	s__Limivivens sp900066135	23	28	10	1	1	2	0	0	0
ONT_hybrid_DHB_bins.796	d__Bacteria	p__Bacillota	c__Clostridia	o__TANB77	f__CAG-508	g__CAMCHB01	s__CAMCHB01 sp945874585	2	0	2	2	0	0	0	0	0
ONT_hybrid_DHB_bins.807	d__Bacteria	p__Bacillota	c__Clostridia	o__Lachnospirales	f__Lachnospiraceae	g__UBA11957	s__UBA11957 sp945827805	4	10	5	1	0	0	0	1	0
ONT_hybrid_DHB_bins.82	d__Bacteria	p__Bacillota	c__Clostridia	o__Peptostreptococcales	f__Anaerovoracaceae	g__Lentihominibacter	s__Lentihominibacter sp022775805	2	8	8	1	0	1	0	0	0
ONT_hybrid_DHB_bins.85	d__Bacteria	p__Bacillota	c__Clostridia	o__Oscillospirales	f__Ruminococcaceae	g__Faecivivens	s__Faecivivens sp945835425	14	26	9	1	0	1	0	1	0
ONT_hybrid_DHB_bins.88	d__Bacteria	p__Bacillota	c__Clostridia	o__Lachnospirales	f__Lachnospiraceae	g__Fimimorpha	s__Fimimorpha sp022778745	11	11	8	0	1	1	0	1	0
ONT_hybrid_DHB_bins.95	d__Bacteria	p__Bacillota	c__Bacilli	o__RFN20	f__CAG-826	g__Onthovivens	s__Onthovivens sp029098125	3	4	5	1	0	0	0	1	0
D11-1	d__Bacteria	p__Bacillota	c__Bacilli	o__Bacillales	f__Bacillaceae	g__Bacillus	s__Bacillus velezensis	29	8	18	1	0	3	3	0	2
D15-1	d__Bacteria	p__Bacillota	c__Bacilli	o__Lactobacillales	f__Lactobacillaceae	g__Ligilactobacillus	s__Ligilactobacillus salivarius	13	4	8	0	0	3	2	0	1
D18-2	d__Bacteria	p__Bacillota	c__Bacilli	o__Lactobacillales	f__Lactobacillaceae	g__Limosilactobacillus	s__Limosilactobacillus reuteri	5	4	7	0	1	2	1	0	0
D21-1	d__Bacteria	p__Bacillota	c__Clostridia	o__Clostridiales	f__Clostridiaceae	g__Sarcina	s__Sarcina perfringens	16	6	9	2	0	0	3	0	0
D6-1	d__Bacteria	p__Bacillota	c__Bacilli	o__Bacillales	f__Bacillaceae	g__Bacillus	s__Bacillus subtilis	28	13	20	1	0	2	0	0	1
D7-1	d__Bacteria	p__Bacillota	c__Bacilli	o__Bacillales	f__Bacillaceae	g__Bacillus	s__Bacillus velezensis	29	8	18	1	0	3	3	0	2
D8-1	d__Bacteria	p__Bacillota	c__Bacilli	o__Lactobacillales	f__Enterococcaceae	g__Enterococcus	s__Enterococcus faecalis	30	14	13	0	0	2	1	0	2
DHB-1-1	d__Bacteria	p__Bacillota	c__Bacilli	o__Bacillales	f__Bacillaceae	g__Bacillus	s__Bacillus velezensis	29	7	20	1	0	3	2	0	2
X6-1	d__Bacteria	p__Bacillota	c__Bacilli	o__Bacillales	f__Bacillaceae	g__Bacillus	s__Bacillus safensis	31	11	21	3	0	2	2	0	0
X7-1	d__Bacteria	p__Pseudomonadota	c__Gammaproteobacteria	o__Enterobacterales	f__Enterobacteriaceae	g__Citrobacter_A	s__Citrobacter_A sp013836145	35	21	19	0	1	3	4	0	2
Y47-1	d__Bacteria	p__Bacillota	c__Bacilli	o__Lactobacillales	f__Enterococcaceae	g__Enterococcus_A	s__Enterococcus_A avium	61	13	15	1	1	3	3	0	0
Y55-1	d__Bacteria	p__Pseudomonadota	c__Gammaproteobacteria	o__Enterobacterales	f__Enterobacteriaceae	g__Phytobacter	s__Phytobacter ursingii	42	27	31	3	6	2	5	3	0
Y55-2	d__Bacteria	p__Pseudomonadota	c__Gammaproteobacteria	o__Enterobacterales	f__Enterobacteriaceae	g__Phytobacter	s__Phytobacter ursingii	42	27	32	3	6	2	5	3	0
Y8-1	d__Bacteria	p__Bacillota	c__Bacilli	o__Bacillales	f__Bacillaceae_G	g__Bacillus_A	s__Bacillus_A cereus	27	12	34	4	1	3	5	0	2
Y81-1	d__Bacteria	p__Pseudomonadota	c__Gammaproteobacteria	o__Xanthomonadales	f__Xanthomonadaceae	g__Stenotrophomonas	s__Stenotrophomonas acidaminiphila_A	10	18	35	0	3	0	0	0	0
Y82-2	d__Bacteria	p__Pseudomonadota	c__Gammaproteobacteria	o__Xanthomonadales	f__Xanthomonadaceae	g__Stenotrophomonas	s__Stenotrophomonas acidaminiphila_A	10	18	35	0	3	0	0	0	0
Y9-1	d__Bacteria	p__Bacillota	c__Bacilli	o__Bacillales	f__Bacillaceae_G	g__Bacillus_A	s__Bacillus_A cereus	27	12	34	4	1	3	5	0	2
